# Supplementary material for: Study of the electrooxidation of borohydride on a directly formed CoB/Ni-foam electrode and its application in membraneless direct borohydride fuel cells
Source: Royal Society of Chemistry journal article supplement (doi:10.1039/c7ta03464d), 2017-01-01
Supplement: c7ta03464d1.pdf [file c7ta03464d1.pdf]

## Supplementary Information

### Study of the Electro-Oxidation of Borohydride on Directly Formed CoB/Ni-foam Electrode and Its Application in Membraneless Direct Borohydride Fuel Cells

*Siqi Guo<sup>a</sup>, Jie Sun<sup>a</sup>, Zhengyan Zhang<sup>a</sup>, Aokai Sheng<sup>a</sup>, Ming Gao<sup>a</sup>, Zhibin Wang<sup>b</sup>,  
Bin Zhao<sup>a,\*</sup>, Weiping Ding<sup>a</sup>*

<sup>a</sup>Key Laboratory of Mesoscopic Chemistry of MOE, School of Chemistry and Chemical  
Engineering, Nanjing University, Nanjing 210046, PR China

<sup>b</sup>State Key Laboratory of Coordination Chemistry, School of Chemistry and Chemical  
Engineering, Nanjing University, Nanjing 210046, PR China

\* To whom correspondence should be addressed.

E-mail: binzhao@nju.edu.cn

## SAED analysis

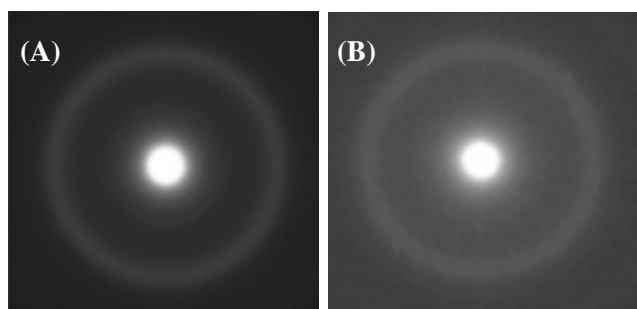

**Fig. S1** The SAED patterns of CoB particles in (A) CoB/Ni-foam (7EP) and (B) CoB plate

The SEAD tests were performed to clarify the structure of CoB in CoB/Ni-foam (7EP) and CoB plate, the results were shown in Fig. S1. Both the patterns demonstrated dispersive ring which indicated non-crystalline nature of CoB and the results were in good accordance with the Lu's work.<sup>1</sup>

Note: Because of the high stability of CoB/Ni-foam, the CoB in CoB/Ni-foam (7EP) could only be detached from the Ni-foam substrate by sonicating it in deoxygenated water for 1 hour.

## The method for analyzing the active surface areas of CoB/Ni-foam

The active surface areas of CoB/Ni-foam (or CoB plate) were evaluated by scanning CVs in a solution with redox couple of  $K_3[Fe(CN)_6]$  and  $K_4[Fe(CN)_6]$  and calculated according to Randles – Sevcik equation:<sup>2</sup>

$$i_p = 0.4463 \times 10^{-3} n^{3/2} F^{3/2} A (RT)^{-1/2} D_R^{1/2} C_R \nu^{1/2} \quad (1)$$

where  $i_p$  was the peak current (A),  $n$  was the number of electron transferred (for  $K_3[Fe(CN)_6]$  /  $K_4[Fe(CN)_6]$ ,  $n = 1$ ),  $F$  was the Faraday constant ( $96485 \text{ C mol}^{-1}$ ),  $C_R$  was the concentration of  $K_4[Fe(CN)_6]$  ( $\text{mol L}^{-1}$ ),  $D_R$  was the diffusion coefficient of  $K_4[Fe(CN)_6]$  ( $3.7 \times 10^{-6} \text{ cm}^2 \text{ s}^{-1}$ ),  $\nu$  was the scan rate ( $\text{V s}^{-1}$ ) and  $A$  was the active surface area ( $\text{cm}^2$ ). Because of the instability of CoB in  $K_4[Fe(CN)_6]$  solution, only the active surface area of Ni-foam substrate could be measured by this method and the result was  $0.355 \text{ cm}^2$ .

It was also known that the double layer capacitance was proportional to the active surface area.<sup>3-5</sup> Hence, the active surface areas of the CoB/Ni-foam catalysts could be calculated according to the following equation:

$$\frac{A_{\text{Ni-foam}}}{A_{\text{CoB/Ni-foam}}} = \frac{C_{\text{Ni-foam}}}{C_{\text{CoB/Ni-foam}}} \quad (2)$$

Where  $C_{\text{Ni-foam}}$  and  $C_{\text{CoB/Ni-foam}}$  were the double layer capacitances of Ni-foam substrate and CoB/Ni-foam, respectively.  $A_{\text{Ni-foam}}$  and  $A_{\text{CoB/Ni-foam}}$  were the active surface areas of Ni-foam substrate and CoB/Ni-foam, respectively.

The double layer capacitances of the catalysts could be estimated in  $N_2$  saturated  $2 \text{ mol L}^{-1}$  KOH solution at a scan rate of  $0.05 \text{ V s}^{-1}$  in the potential range of  $-0.4 \text{ V}$  to  $-0.35 \text{ V}$  vs. Hg/HgO according to the following equation:<sup>6</sup>

$$C = \frac{\int IdV}{\nu \Delta V} \quad (3)$$

where  $\nu$  was the scan rate ( $\text{V s}^{-1}$ ),  $\Delta V$  was the potential range (V), and  $\int IdV$  was the charge of double layer.

## XPS analysis

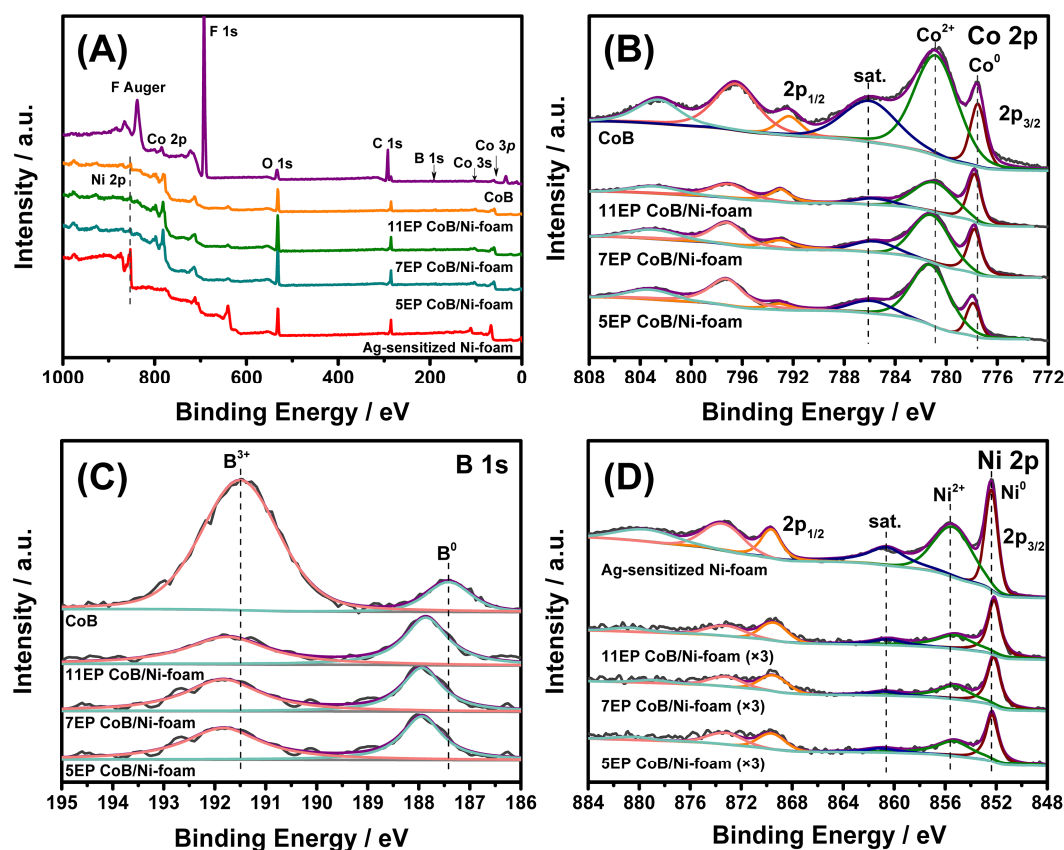

**Fig. S2** XPS spectra of the Ag-sensitized Ni-foam, CoB/Ni-foam, CoB catalysts: (A) the survey spectra and the high resolution spectra for (B) Co 2p, (C) B 1s and (D) Ni 2p

XPS was performed to further investigate the surface existing states and the compositions of CoB/Ni-foam and CoB plate catalysts. The survey spectra of CoB/Ni-foam and CoB plate were shown in Fig. S2 (A). The existence of O was attributed to the surface oxidation during the XPS analysis. The surface composition and binding energy of each element were summarized in Table S1. The surface concentrations of Co for CoB/Ni-foam catalysts were much higher than that of CoB plate indicated the severe coverage of CoB by PTFE in CoB plate which was confirmed by the high surface concentration of F. Co was regarded as the active species for  $\text{BH}_4^-$  oxidation reaction, and the lower surface concentration of Co for CoB plate could account for its low catalytic activity. The Co  $2p_{3/2}$  bands of CoB/Ni-foam and CoB plate (Fig. S2 (B)) could be deconvoluted into three bands, corresponding to  $\text{Co}^0$ ,  $\text{Co}^{2+}$  and satellite peak respectively and all the catalysts showed similar binding energy of  $\text{Co}^0$ . The high resolution B 1s spectra were shown in Fig. S2 (C), the binding energy of  $\text{B}^0$  for CoB/Ni-foam catalysts and CoB plate were higher than the literature (187.1 eV)<sup>7,8</sup> which was attributed to the electron-donating effects from  $\text{B}^0$  to  $\text{Co}^0$ . Interestingly, the binding energy of  $\text{B}^0$  in CoB/Ni-foam catalysts were about 0.3 eV higher than that of CoB plate which might be due to the further electron transfer from  $\text{B}^0$  to  $\text{Ni}^0$ . The high-resolution of spectra Ni 2p were shown in Fig. S2 (D). As expected, the binding energy of  $\text{Ni}^0$  for CoB/Ni-foam catalysts decreased compared to the Ag-sensitized Ni-foam substrate which confirmed the electron transfer between  $\text{B}^0$  and  $\text{Ni}^0$ . Based on the XPS results, it could be clearly seen that there was a strong interaction between CoB and Ni-foam substrate in the directly formed CoB/Ni-foam catalysts prepared by electroless plating method which gave them a nice all-around performance boost.

## Study the cyclic voltammetry (CV) in NaOH solution

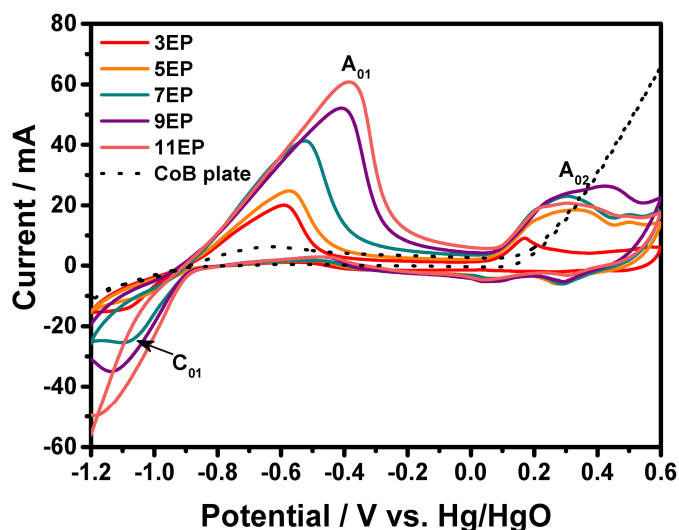

**Fig. S3** Cyclic voltammograms of CoB/Ni-foam catalysts and CoB plate in  $N_2$ -saturated  $3 \text{ mol L}^{-1}$  NaOH solution (at scan rate of  $50 \text{ mV s}^{-1}$  at  $298 \text{ K}$ )

Fig. S3 showed the cyclic voltammograms of CoB/Ni-foam and CoB plate in a potential range of  $-1.2 \text{ V}$  to  $0.6 \text{ V}$  vs. Hg/HgO at a scan rate of  $50 \text{ mV s}^{-1}$  in  $3 \text{ mol L}^{-1}$   $N_2$  saturated NaOH solution. All the CoB/Ni-foam catalysts with different plating times showed similar electrochemical behaviors which were typical irreversible electrochemical process and in good accordance with the work reported by Y. Liu.<sup>9</sup> During the positive potential sweep, it could be clearly seen that a wide oxidation peak denoted as  $A_{01}$  appeared between  $-0.9 \text{ V}$  and  $0.1 \text{ V}$  vs. Hg/HgO which was attributed to the electrooxidation of CoB alloy to  $\text{Co}(\text{OH})_2$ .<sup>9</sup> Corresponding to peak  $A_{01}$ , the reduction peak denoted as  $C_{01}$  in negative scanning process was attributed to the reduction of  $\text{Co}(\text{OH})_2$ .<sup>10</sup> In addition, there were several anodic peaks emerged in the high potential range of positive scanning process (denoted as  $A_{02}$ ). These peaks were attributed to the oxidation of Co to higher oxidation states step by step according to the following reactions<sup>11</sup>:

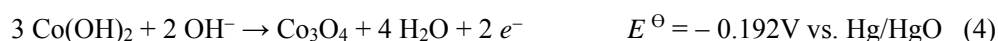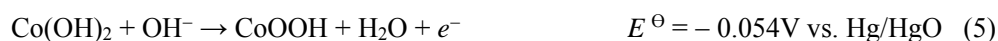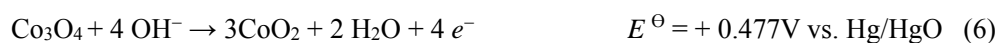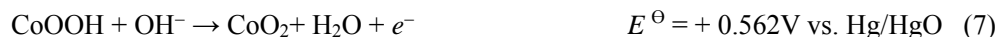

The beginning of peak  $A_{02}$  was about  $+0.1 \text{ V}$  vs. Hg/HgO. Compared to the thermodynamically calculated value ( $E^\ominus$ ) of  $-0.192 \text{ V}$  mentioned above, the positive potential shift indicated that there was a big overpotential involved in the oxidation of  $\text{Co}(\text{OH})_2$  to  $\text{Co}_3\text{O}_4$  or might be attributed to existence of B in CoB alloy. As shown in Fig. S3, the currents of peak  $A_{01}$  and  $A_{02}$  increased with the plating times which accorded well with the CoB loading amount, XRD and SEM analysis results.

## Study BOR activity by linear sweep voltammetry (LSV)

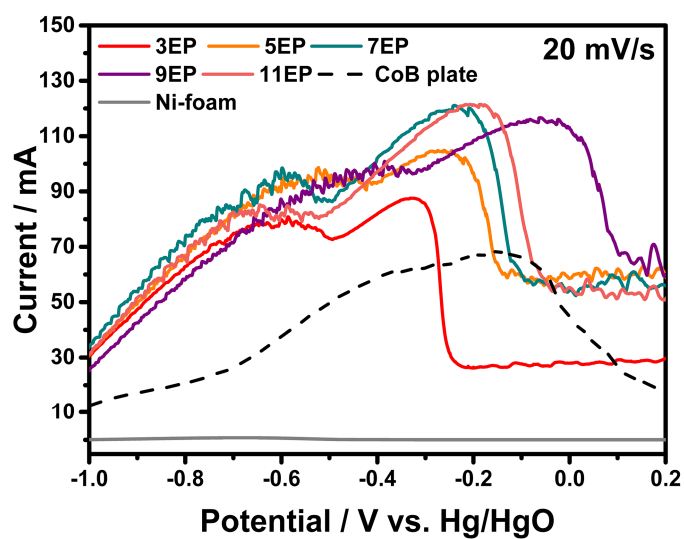

**Fig. S4** Linear sweep voltammograms of CoB/Ni-foam catalysts with different electroless plating times in  $N_2$ -saturated  $0.05 \text{ mol L}^{-1} \text{ NaBH}_4 + 3 \text{ mol L}^{-1} \text{ NaOH}$  solution with scan rate of  $20 \text{ mV/s}$  at  $298 \text{ K}$

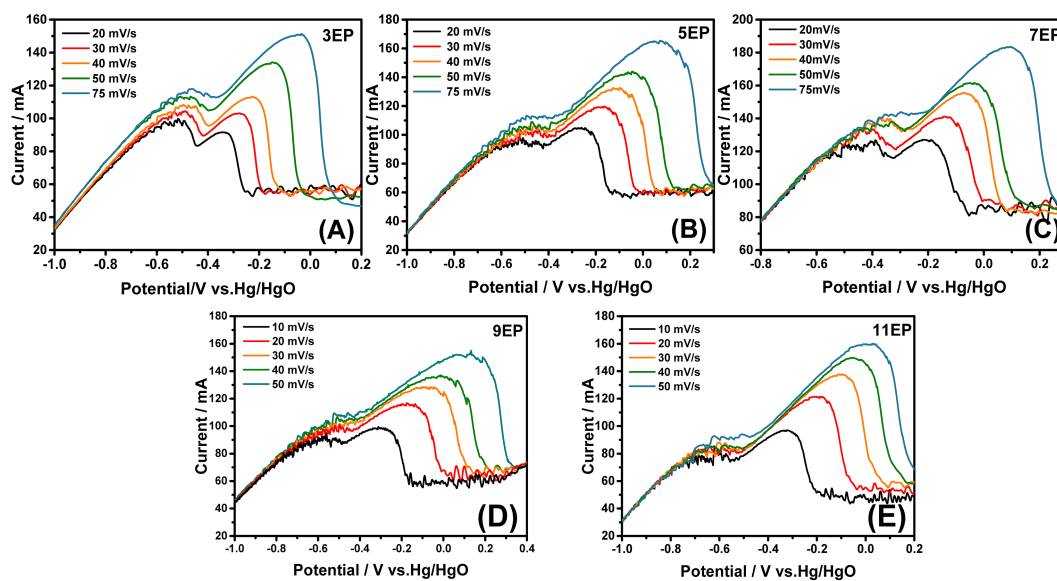

**Fig. S5** Linear sweep voltammograms of CoB/Ni-foam catalysts with different electroless plating times in  $N_2$ -saturated  $0.05 \text{ mol L}^{-1} \text{ NaBH}_4 + 3 \text{ mol L}^{-1} \text{ NaOH}$  solution with different scan rates at  $298 \text{ K}$

The relationship of  $E_p$  with  $\log v$  and  $I_p$  with  $v^{1/2}$  (for calculating electron transferred number of  $n$ )

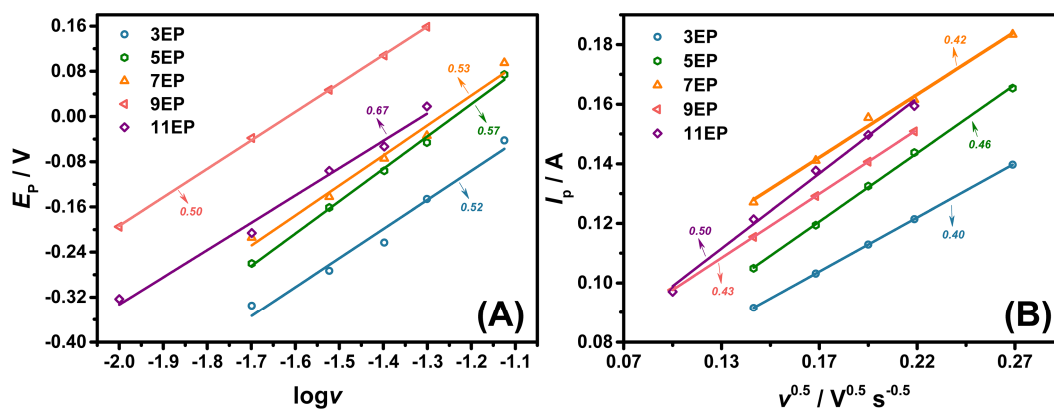

**Fig. S6** (A) the dependence of peak current  $I_p$  on the square root of scan rate ( $v^{1/2}$ ) and (B) the dependence of peak potential  $E_p$  on the logarithm of scan rate ( $\log v$ )

### Determination of heterogeneous rate constants ( $k_s$ )

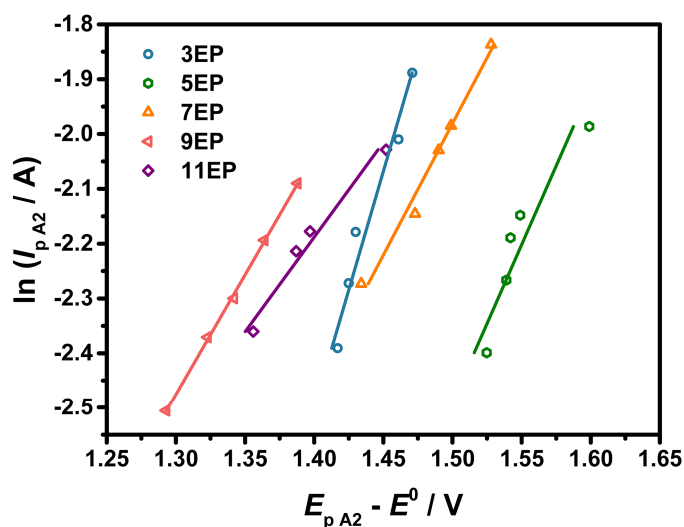

**Fig. S7** Plots of  $\ln I_{pA2}$  vs.  $(E_{pA2} - E^0)$  of CoB/Ni-foam catalysts with different electroless plating times in  $N_2$ -saturated  $0.05 \text{ mol L}^{-1} \text{ NaBH}_4 + 3 \text{ mol L}^{-1} \text{ NaOH}$  solution at 298 K

The standard heterogeneous rate constants  $k_s / \text{cm s}^{-1}$  during borohydride electrooxidation process could be calculated by the following equation <sup>2</sup>:

$$I_p = 0.227nFAC_{\text{BH}_4^-}k_s \exp \left\{ \left[ \frac{(1-\alpha)n_\alpha F}{RT} \right] (E_p - E^0) \right\}$$

where  $I_p$  was the peak current (A),  $n$  was the number of electron transferred (calculated in section 3.2),  $F$  was the Faraday constant ( $96485 \text{ C mol}^{-1}$ ),  $A$  was the active surface area ( $\text{cm}^2$ ),  $C_R$  was the concentration of  $\text{BH}_4^-$  ( $\text{mol dm}^{-3}$ ),  $E_p$  was the peak potential (V) and  $E^0$  was the formal potential (V). The standard heterogeneous rate constants  $k_s$  could be obtained by plotting  $\ln I_{pA2}$  vs.  $(E_{pA2} - E^0)$  curves, and the intercepts of the curves was proportional to  $k_s$ . The results were summarized in Table S2.



## Cell performance using CoB plate as anode

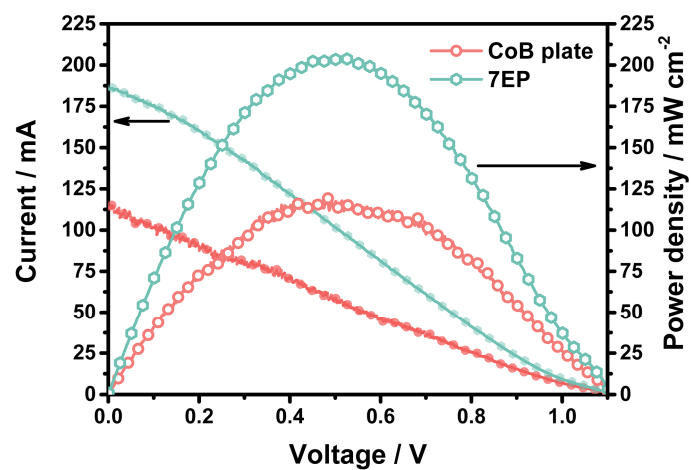

**Fig. S8** Cell polarization and power density curves of the membraneless DBFC with CoB plate anode in  $1 \text{ mol L}^{-1} \text{ NaBH}_4 + 3 \text{ mol L}^{-1} \text{ NaOH}$  solution at 303 K

**Table. S1** The surface compositions and the corresponding binding energies of CoB/Ni-foam, CoB plate, Ag-sensitized Ni-foam

| Catalyst                    |                 | 5EP   | 7EP   | 11EP  | CoB Plate | Ag-sensitized Ni-foam |
|-----------------------------|-----------------|-------|-------|-------|-----------|-----------------------|
| Surface composition (At. %) | Co              | 18.6  | 16.7  | 19.1  | 1.8       | –                     |
|                             | B               | 6.6   | 8.1   | 10.9  | 0.7       | –                     |
|                             | Ni              | 3.3   | 2.1   | 4.6   | *         | 27.0                  |
|                             | Ag              | 0.04  | 0.05  | 0.06  | –         | –                     |
|                             | O               | 41.4  | 36.6  | 35.8  | 5.6       | 36.3                  |
|                             | C               | 30.0  | 36.4  | 29.4  | 29.7      | 36.7                  |
|                             | F               | –     | –     | –     | 62.2      | –                     |
| Binding energy / eV         | Co <sup>0</sup> | 777.9 | 777.8 | 777.8 | 777.7     | –                     |
|                             | B <sup>0</sup>  | 187.9 | 187.9 | 187.9 | 187.4     | –                     |
|                             | Ni <sup>0</sup> | 852.3 | 852.1 | 852.2 | –         | 852.4                 |

\* The surface Ni content could not be obtained because the Ni 2*p* band of CoB plate was overlapped with F auger band and the Ni 3*p* band was too weak to be used for quantification.

**Table. S2** Standard heterogeneous rate constants  $k_s / \text{cm s}^{-1}$  calculated from the plots of  $\ln I_{pA2}$  vs.  $(E_{pA2} - E^0)$

| Catalyst                 | 3EP                  | 5EP                  | 7EP                  | 9EP                  | 11EP                 |
|--------------------------|----------------------|----------------------|----------------------|----------------------|----------------------|
| $k_s / \text{cm s}^{-1}$ | $6.3 \times 10^{-5}$ | $6.9 \times 10^{-5}$ | $6.7 \times 10^{-5}$ | $6.3 \times 10^{-5}$ | $6.2 \times 10^{-5}$ |

## References

- 1 Y. C. Lu, M. S. Chen and Y. W. Chen, *Int. J. Hydrogen Energy*, 2012, **37**, 4254-4258.
- 2 A. J. Bard and L. R. Faulkner, *Electrochemical Methods: Fundamentals and Applications*, John Wiley, New York, 4ed, 2001.
- 3 W. Xing, S. Z. Qiao, R. G. Ding, F. Li, G. Q. Lu, Z. F. Yan and H. M. Cheng, *Carbon*, 2006, **44**, 216-224.
- 4 C. H. Xu, B. H. Xu, Y. Gu, Z. G. Xiong, J. Sun and X. S. Zhao, *Energy Environ. Sci.*, 2013, **6**, 1388-1414.
- 5 L. L. Zhang, R. Zhou and X. S. Zhao, *J. Mater. Chem.*, 2010, **20**, 5983-5992.
- 6 C. B. Liu, H. Zhang, Y. H. Tang and S. L. Luo, *J. Mater. Chem. A*, 2014, **2**, 4580-4587.
- 7 N. Patel, R. Fernandes and A. Miotello, *J Catal*, 2010, **271**, 315-324.
- 8 C. Wu, Y. Bai, D. X. Liu, F. Wu, M. L. Pang and B. L. Yi, *Catal Today*, 2011, **170**, 33-39.
- 9 Y. Liu, Y. J. Wang, L. L. Xiao, D. W. Song, Y. P. Wang, L. F. Jiao and H. T. Yuan, *Electrochim. Acta*, 2008, **53**, 2265-2271.
- 10 Q. Zhu, D. S. Lu, J. J. Lin and L. Du, *J. Electroanal. Chem.*, 2014, **722-723**, 102-109.
- 11 K. B. Wishvender and E. T. Jorge, *J. Electroanal. Chem.*, 1971, **31**, 63-75.
